# Supplementary material for: Cross Cultural Adaptation and Cognitive Testing of a Psycho-Social-Spiritual Healing Measure, the NIH Healing Experiences in All Life Stressors-NIH-HEALS
Source: PubMed Central journal article supplement — Glob Adv Health Med. 2022 Jan 24;11:21649561211067189. doi: 10.1177/21649561211067189 (PMC8793392; doi:10.1177/21649561211067189), 2022-01-24
Supplement: sj-pdf-1-gam-10.1177_21649561211067189.pdf [file sj-pdf-1-gam-10.1177_21649561211067189.pdf]

Supplementary file 1 : Mapping of the patient descriptions of psycho-social-spiritual healing on to the NIH-HEALS factors

| Patient ID | Response                                                                                                                                                                                                                                               | Factor 1.<br>Connection—<br>belief in and connection to a<br>higher power, religion, religious<br>community, and family; | Factor 2<br>Reflection & Introspection—<br>finding meaning, purpose, gratitude<br>and joy in nature, activities including<br>those that connect mind and body,<br>interconnectedness, present moment<br>orientation, and an increased sense of<br>awareness about the fragility of life | Factor 3<br>Trust & Acceptance—<br>accepting what is, feeling<br>resolved, feeling at peace,<br>and trusting that caregivers,<br>friends, and family will<br>respond to needs as they<br>arise. |
|------------|--------------------------------------------------------------------------------------------------------------------------------------------------------------------------------------------------------------------------------------------------------|--------------------------------------------------------------------------------------------------------------------------|-----------------------------------------------------------------------------------------------------------------------------------------------------------------------------------------------------------------------------------------------------------------------------------------|-------------------------------------------------------------------------------------------------------------------------------------------------------------------------------------------------|
| UG-30-2021 | Accept God, surrender your life to God.<br>Trust him completely, accept his will.                                                                                                                                                                      |                                                                                                                          |                                                                                                                                                                                                                                                                                         | X                                                                                                                                                                                               |
| UG-02-2021 | Do not go to hell, have God's blessings to<br>feel peace and to heal. God can take away<br>cancer                                                                                                                                                      | X                                                                                                                        |                                                                                                                                                                                                                                                                                         |                                                                                                                                                                                                 |
| UG-05-2020 | Spiritual healing is very good and that is<br>coming to God and believing God is in<br>control of everything instead of<br>wandering. It would be good for everyone<br>to come to God for spiritual healing.                                           | X                                                                                                                        |                                                                                                                                                                                                                                                                                         |                                                                                                                                                                                                 |
| UG-06-2020 | It means having hope.                                                                                                                                                                                                                                  |                                                                                                                          | X                                                                                                                                                                                                                                                                                       |                                                                                                                                                                                                 |
| UG-07-2020 | There is when your sickness cannot be<br>cured but your heart accepts it.                                                                                                                                                                              |                                                                                                                          |                                                                                                                                                                                                                                                                                         | X                                                                                                                                                                                               |
| UG-08-2020 | It means I am cured from the sickness; it<br>no longer affects me.                                                                                                                                                                                     |                                                                                                                          |                                                                                                                                                                                                                                                                                         | X                                                                                                                                                                                               |
| UG-09-2020 | Healing from sickness means happiness.                                                                                                                                                                                                                 |                                                                                                                          | X                                                                                                                                                                                                                                                                                       |                                                                                                                                                                                                 |
| UG-11-2020 | Believing God is going to do great things<br>I am not the way I was.                                                                                                                                                                                   | X                                                                                                                        |                                                                                                                                                                                                                                                                                         |                                                                                                                                                                                                 |
| UG-12-2021 | Healing means you have hope to lead your<br>life to the future.                                                                                                                                                                                        |                                                                                                                          |                                                                                                                                                                                                                                                                                         | X                                                                                                                                                                                               |
| UG-35-2021 | Healing to me means you have been<br>having a problem affecting you which you<br>have to overcome in one way or the other.<br>You may have the means to do so, you<br>may not have the means to do so. If<br>achieved, it should be able to solve that |                                                                                                                          |                                                                                                                                                                                                                                                                                         | X                                                                                                                                                                                               |

|            |                                                                                                                                                                                            |   |   |   |
|------------|--------------------------------------------------------------------------------------------------------------------------------------------------------------------------------------------|---|---|---|
|            | difficulty which you have say some condition of health, some difficulty in life, some challenges which are about to demolish your life, you need something to help you out of it.          |   |   |   |
| UG-13-2021 | My healing will happen but I cannot take back this thing. I hope to get healed but the disability on my body will remain.                                                                  |   |   | X |
| UG-14-2021 | There is healing when the disease affecting you is cured say you get cough, malaria and you treat. There is when you have a condition that will not heal. So then that is eternity.        |   |   | X |
| UG-15-2021 | Healing is when I am cured of this condition. Others may be critically sick and pray that God takes them, and they call that healing. In my belief, I ask God to heal me of this sickness. | X |   |   |
| UG-16-2021 | It means being in good health like others and be able to work. When you are well, you enjoy your life.                                                                                     |   | X |   |
| UG-18-2021 | Healing means to recover from whatever illness or distress that one may be experiencing.                                                                                                   |   |   | X |
| UG-21-2021 | Someone to heal you first accept your situation and acceptance helps one to heal.                                                                                                          |   |   | X |
| UG-22-2021 | It means coming out of a problem.                                                                                                                                                          |   |   | X |
| UG-23-2021 | Healing is being well in my life                                                                                                                                                           |   | X |   |
| UG-25-2021 | It is about believing that a person can get healed.                                                                                                                                        | X |   |   |
| UG-26-2021 | It means getting cured of a sickness                                                                                                                                                       |   |   | X |

|            |                                                                                                                                                                                                                                                                                                     |   |   |   |
|------------|-----------------------------------------------------------------------------------------------------------------------------------------------------------------------------------------------------------------------------------------------------------------------------------------------------|---|---|---|
| UG-27-2021 | Healing for me it means recovering from sickness or a problem or whatever challenge you have.                                                                                                                                                                                                       |   |   | X |
| UG-28-2021 | I have accepted my condition whether I will cure or not, I live with it.                                                                                                                                                                                                                            |   |   | X |
| UG-29-2021 | R: It means getting totally cured of the disease.                                                                                                                                                                                                                                                   |   | X |   |
| UG-01-2020 | It means having peace.                                                                                                                                                                                                                                                                              |   |   | X |
| UG-02-2020 | To be free from all pains.                                                                                                                                                                                                                                                                          |   |   | X |
| UG-03-2020 | To free of the problems of the world.                                                                                                                                                                                                                                                               |   |   | X |
| UG-07-2021 | It means change of illness status, believe in that healing to know that all will be well even when death is eminent.                                                                                                                                                                                |   |   | X |
| UG-32-2021 | It means death                                                                                                                                                                                                                                                                                      |   |   | X |
| UG-09-2021 | Being free in life without anything bothering your life.                                                                                                                                                                                                                                            |   |   |   |
| UG-33-2021 | Have God's blessing to feel peace and to heal. God can take away the cancer.                                                                                                                                                                                                                        | X |   | X |
| UG-34-2021 | Accept God. Surrender your life to God. Trust him completely. Accept his will.<br><br>My friends have been valuable they have taught me much about threats to life, seeking care and accepting things you cannot do. Being connected with friends have been very valuable to me. So I am not alone. | X |   | X |
